# Supplementary material for: Cellulose/Zeolitic Imidazolate Framework (ZIF-8) Composites with Antibacterial Properties for the Management of Wound Infections
Source: MDPI journal article supplement (doi:10.3390/jfb14090472), 2023-09-13
Supplement: s1 [file s1]

Article

# Cellulose/Zeolitic Imidazolate Framework (ZIF-8) Composites with Antibacterial Properties for the Management of Wound Infections

Valentina Di Matteo <sup>1</sup>, Maria Francesca Di Filippo <sup>2</sup>, Barbara Ballarin <sup>1,3,4</sup>, Giovanna Angela Gentilomi <sup>5,6</sup>, Francesca Bonvicini <sup>5,\*</sup>, Silvia Panzavolta <sup>2,4</sup> and Maria Cristina Cassani <sup>1,7,\*</sup>

<sup>1</sup> Department of Industrial Chemistry “Toso Montanari”, University of Bologna, Viale del Risorgimento 4, 40136 Bologna, Italy; valentina.dimatteo5@unibo.it (V.D.M.); barbara.ballarin@unibo.it (B.B.)

<sup>2</sup> Department of Chemistry “G. Ciamician”, University of Bologna, Via Selmi 2, 40126 Bologna, Italy; maria.difilippo5@unibo.it (M.F.D.F.); silvia.panzavolta@unibo.it (S.P.)

<sup>3</sup> Center for Industrial Research—Fonti Rinnovabili, Ambiente, Mare e Energia CIRI FRAME, University of Bologna, Viale del Risorgimento 2, 40136 Bologna, Italy

<sup>4</sup> Center for Industrial Research—Advanced Applications in Mechanical Engineering and Materials Technology CIRI MAM, University of Bologna, Viale del Risorgimento 2, 40136 Bologna, Italy;

<sup>5</sup> Department of Pharmacy and Biotechnology, University of Bologna, Via Massarenti 9, 40138, Italy; giovanna.gentilomi@unibo.it (G.A.G.)

<sup>6</sup> Microbiology Unit, IRCCS Azienda Ospedaliero-Universitaria di Bologna, Via Massarenti 9, 40138 Bologna, Italy

<sup>7</sup> Health Sciences and Technologies—Interdepartmental Center for Industrial Research (HST-ICIR), Alma Mater Studiorum—University of Bologna, 40064 Ozzano dell’Emilia, Bologna, Italy

\* Correspondence: francesca.bonvicini4@unibo.it (F.B.); maria.cassani@unibo.it (M.C.C.)

**Citation:** Di Matteo, V.; Di Filippo, M.F.; Ballarin, B.; Gentilomi, G.A.; Bonvicini, F.; Panzavolta, S.; Cassani, M.C. Cellulose/Zeolitic Imidazolate Framework (ZIF-8) Composites with Antibacterial Properties for the Management of Wound Infections. *J. Funct. Biomater.* **2023**, *14*, x. <https://doi.org/10.3390/xxxxx>

Academic Editor: Aharon Azagury, Malka Shilo

Received: 18 July 2023

Revised: 29 August 2023

Accepted: 8 September 2023

Published: 13 September 2023

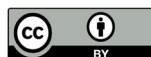

**Copyright:** © 2023 by the authors. Submitted for possible open access publication under the terms and conditions of the Creative Commons Attribution (CC BY) license (<https://creativecommons.org/licenses/by/4.0/>).

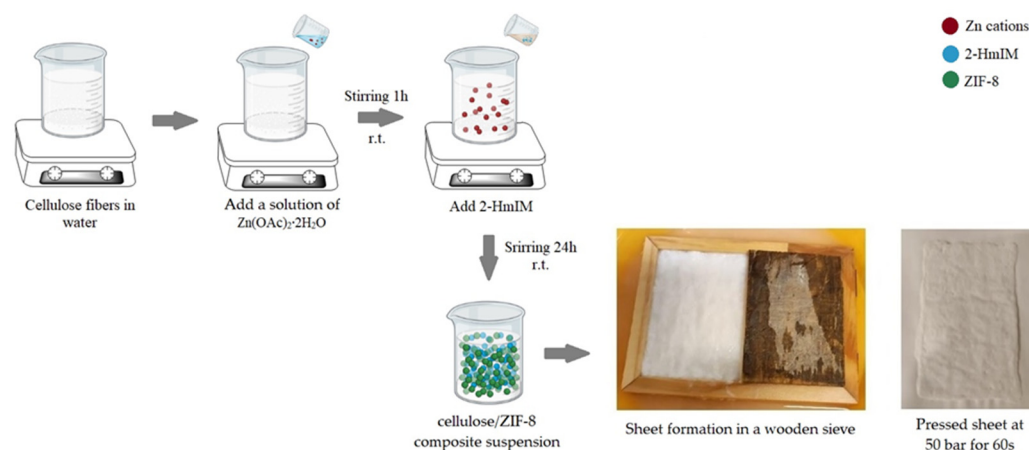

**Figure S1.** Schematic representation (done with “BioRender”) of the Cell@ZIF-8 samples synthesis.

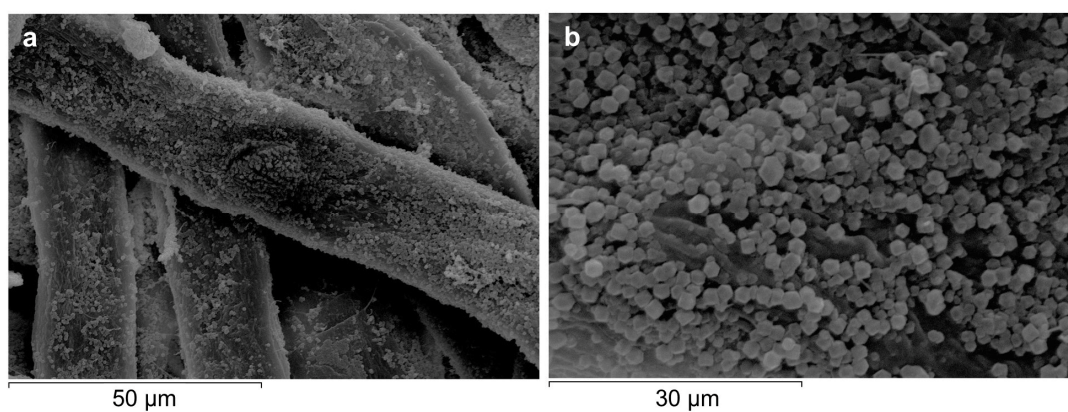

**Figure S2.** SEM image of the *activated* Cell2@ZIF-8 sample at different scales: a) 50 and b) 30  $\mu\text{m}$ ).

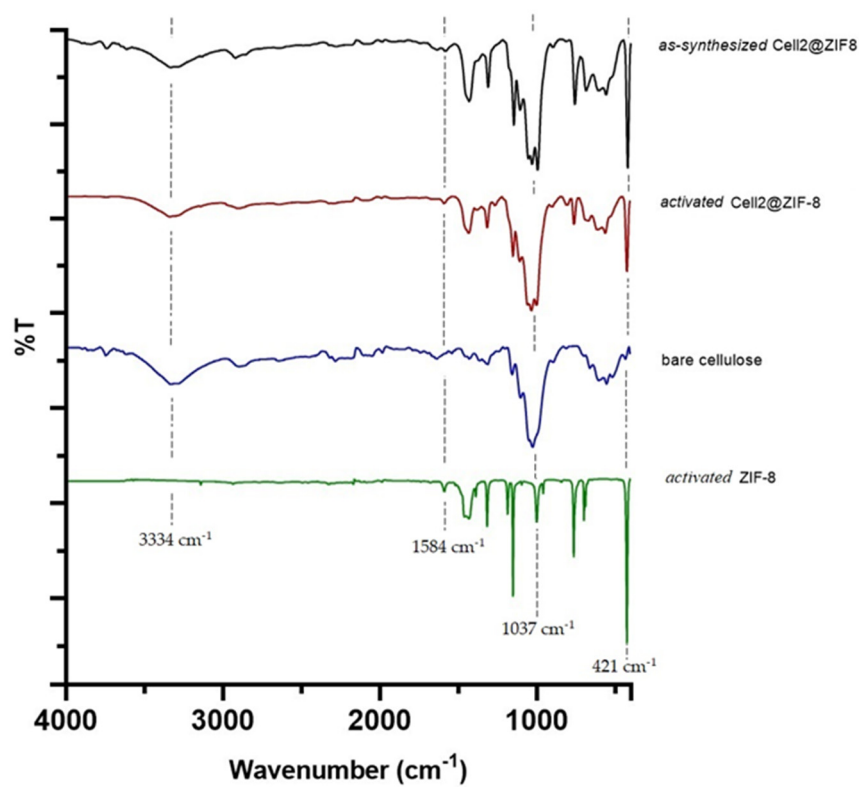

**Figure S3.** Comparison between the IR spectra of the bare cellulose, Cell2@ZIF-8 and pure ZIF-8 samples.

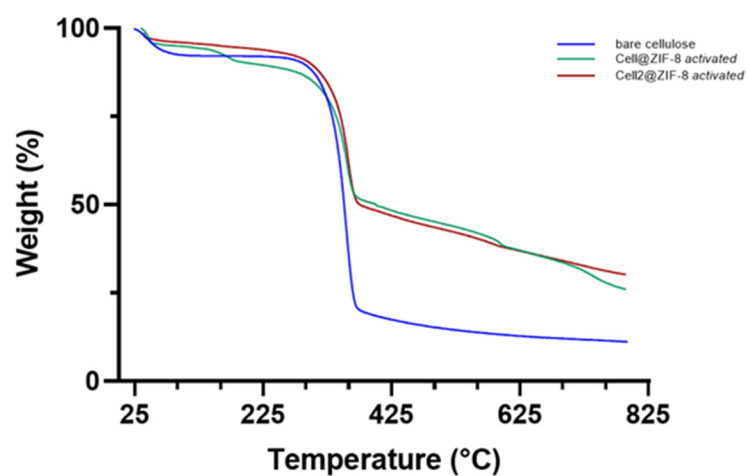

**Figure S4.** Comparison between the thermograms of bare cellulose (blue), *activated* Cell@ZIF-8 (green) and *activated* Cell2@ZIF-8 (red) samples.

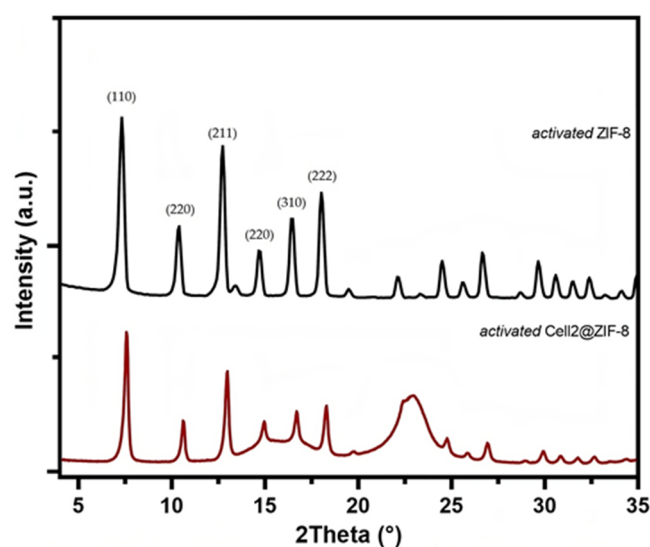

**Figure S5.** XRD diffractograms of *activated* Cell2@ZIF-8 (red) and pure ZIF-8 (black).

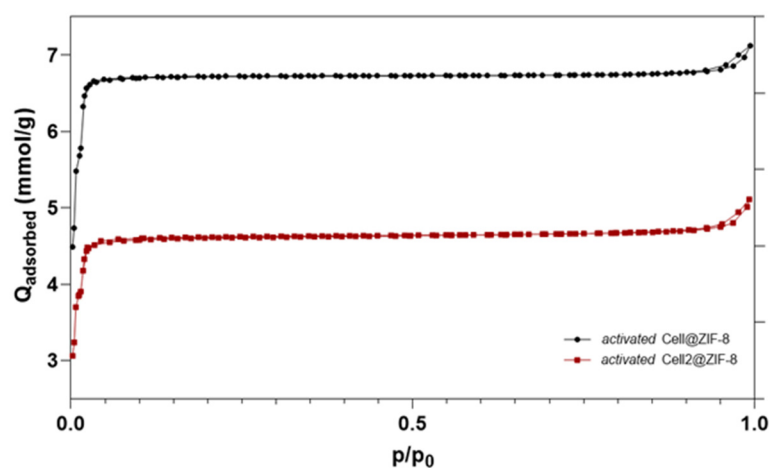

**Figure S6.** Adsorption and desorption isotherms of *activated* Cell@ZIF-8 (black) and *activated* Cell2@ZIF-8 (red) samples.

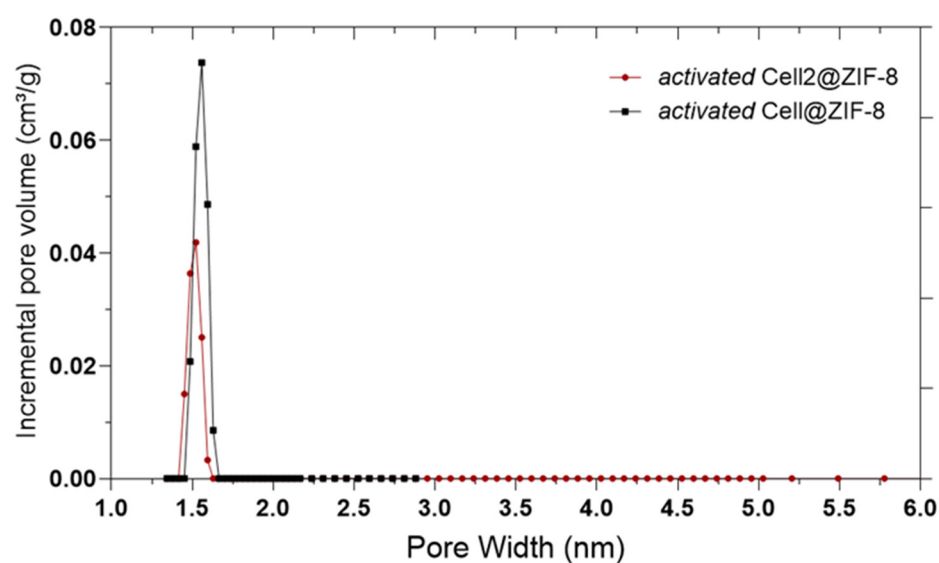

**Figure S7.** Incremental Pore Volume distribution obtained by using DFT of *activated* Cell@ZIF-8 and *activated* Cell2@ZIF-8 samples. The integral of these curves is the total pore volume reported in Table 2.

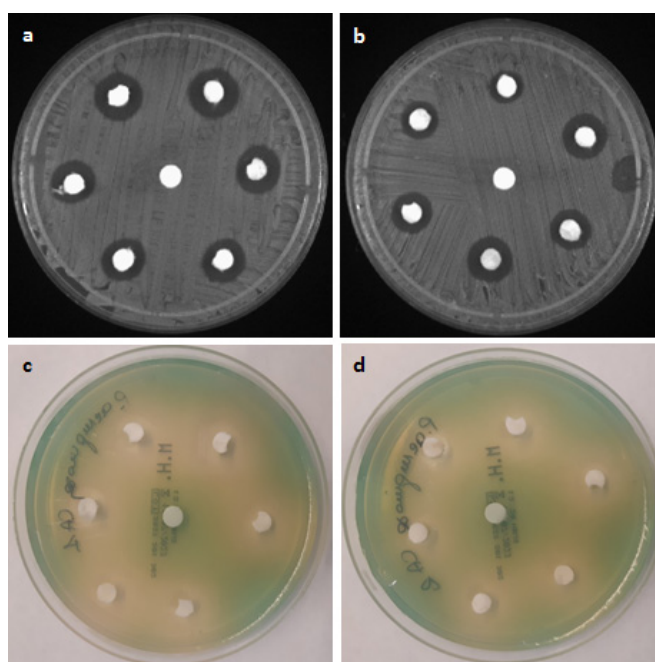

**Figure S8.** Representative pictures of the disk-diffusion tests on *S. epidermidis* with *activated* Cell@ZIF-8 (a) and Cell2@ZIF-8 samples (b) and on *P. aeruginosa* with *activated* Cell@ZIF-8 (c) and Cell2@ZIF-8 samples (d). Six replicates of each sample and a cellulose bare sample (in the middle of the plate) are tested on the same bacterial suspension to measure the intra-assay variability of the materials.

**Table S1.** Antibacterial activity determined with the standardized disk-diffusion test. The diameters of the inhibition zone are expressed in millimeters (mm).

| Reference strains                | Bare cellulose  | Cell@ZIF-8<br><i>as-synthesized</i> | Sterile paper<br>disk | GNT 10 µg | VNC 10 µg |
|----------------------------------|-----------------|-------------------------------------|-----------------------|-----------|-----------|
| <i>S. aureus</i> ATCC 25923      | NA <sup>1</sup> | 9 ± 1                               | NA                    | 18 ± 1    | 14 ± 1    |
| <i>S. epidermidis</i> ATCC 12228 | NA              | 15 ± 1                              | NA                    | 22 ± 1    | 15 ± 1    |
| <i>E. coli</i> ATCC 25922        | NA              | 8 ± 1                               | NA                    | 19 ± 1    | NA        |
| <i>P. aeruginosa</i> ATCC 27853  | NA              | 13 ± 1                              | NA                    | 18 ± 1    | NA        |

<sup>1</sup>NA: Not appeared**Table S2.** Antibacterial activity determined with the agar-cup method. The diameters of the inhibition zone are expressed in millimeters (mm).

| Reference strains                                   | <i>S. epidermidis</i> | <i>P. aeruginosa</i> |
|-----------------------------------------------------|-----------------------|----------------------|
| undiluted ZIF-8 powder <i>as-synthesized</i>        | 19 ± 1                | 20 ± 1               |
| ten-fold diluted ZIF-8 powder <i>as-synthesized</i> | 13 ± 1                | 13 ± 1               |
| undiluted ZIF-8 powder <i>activated</i>             | 19 ± 1                | 20 ± 1               |
| ten-fold diluted ZIF-8 powder <i>activated</i>      | 13 ± 1                | 13 ± 1               |
